# Supplementary material for: IGF2BP3 Promotes Lung Cancer Progression Through FTO Dependent m6A Modification by Stabilizing N-myc
Source: Research Square preprint supplement (doi:10.21203/rs.3.rs-135593/v1), 2020-12-29
Supplement: Supplementary file 1 [file a43fe51cfed18e00d6ffe199.docx]

**Supplementary Table 1**

| **Name** | **Sequences** |
| --- | --- |
| IGF2BP3 site 1 (612-630) | GCAAAGGATTCGGAAACTT |
| IGF2BP3 site 2 (1836-1854) | GGTGAAACTTGAAGCTCAT |
| IGF2BP3 site 3 (1959-1977) | CCAGACACCTGATGAGAAT |
| FTO site 1 (206-224) | GGAGCTCCATAAAGAGGTT |
| FTO site 2 (353-371) | CCTGAACACCAGGCTCTTT |
| FTO site 3 (618-636) | GCAGCATACAACGTAACTT |
| N-myc site 1 (710-728) | CGGACGAAGATGACTTCTA |
| N-myc site 2 (857-875) | CGGAGATGCTGCTTGAGAA |
| N-myc site 3 (1974-1992) | GCAGCAGTTGCTAAAGAAA |
